# Supplementary material
Source: publisher figshare collection journal article supplement (https://karger.figshare.com/ndownloader/files/17485493)
Supplement: Supplementary file 1 [file 17485493]

**Supplementary Table S4. KEGG enrichment of lncRNA host genes between NC group and BMP2-treated group**

| Kegg_pathway | ko_id | Cluter_frequency | Genome_frequency | P-value |
| --- | --- | --- | --- | --- |
| Complement and coagulation cascades | ko04610 | 12 out of 248 | 77 out of 6887 | 0.0000 |
| ECM-receptor interaction | ko04512 | 14 out of 248 | 123 out of 6887 | 0.0001 |
| Glycolysis / Gluconeogenesis | ko00010 | 9 out of 248 | 59 out of 6887 | 0.0002 |
| Staphylococcus aureus infection | ko05150 | 7 out of 248 | 43 out of 6887 | 0.0008 |
| Axon guidance | ko04360 | 14 out of 248 | 159 out of 6887 | 0.0017 |
| Protein digestion and absorption | ko04974 | 10 out of 248 | 93 out of 6887 | 0.0018 |
| TGF-beta signaling pathway | ko04350 | 9 out of 248 | 85 out of 6887 | 0.0033 |
| Cytokine-cytokine receptor interaction | ko04060 | 19 out of 248 | 275 out of 6887 | 0.0047 |
| Arrhythmogenic right ventricular cardiomyopathy (ARVC) | ko05412 | 9 out of 248 | 98 out of 6887 | 0.0085 |
| PPAR signaling pathway | ko03320 | 8 out of 248 | 83 out of 6887 | 0.0097 |
| Histidine metabolism | ko00340 | 4 out of 248 | 25 out of 6887 | 0.0114 |
| Amoebiasis | ko05146 | 11 out of 248 | 144 out of 6887 | 0.0145 |
| Glycerolipid metabolism | ko00561 | 6 out of 248 | 58 out of 6887 | 0.0174 |
| Hypertrophic cardiomyopathy (HCM) | ko05410 | 9 out of 248 | 112 out of 6887 | 0.0192 |
| Vascular smooth muscle contraction | ko04270 | 11 out of 248 | 154 out of 6887 | 0.0228 |
| Regulation of actin cytoskeleton | ko04810 | 16 out of 248 | 258 out of 6887 | 0.0235 |
| Systemic lupus erythematosus | ko05322 | 8 out of 248 | 98 out of 6887 | 0.0245 |
| Fructose and mannose metabolism | ko00051 | 4 out of 248 | 33 out of 6887 | 0.0296 |
| Fatty acid biosynthesis | ko00061 | 2 out of 248 | 8 out of 6887 | 0.0313 |
| Tight junction | ko04530 | 10 out of 248 | 143 out of 6887 | 0.0332 |
